# Supplementary material for: Comparative Analysis of Seven Equations for Estimated Glomerular Filtration Rate and Their Impact on Chronic Kidney Disease Categorization in Korean Patients at Local Clinics and Hospitals
Source: MDPI journal article supplement (doi:10.3390/jcm13071945), 2024-03-27
Supplement: s1 [file s1]

**Supplementary Table S1.** Baseline characteristics of study subjects aged 20 to 75 years (N=5,229).

| Characteristics                                                               | Data                 |
|-------------------------------------------------------------------------------|----------------------|
| Age, year (Median, IQR)                                                       | 55.3 (43.0 to 64.8)  |
| Age group (n, %)                                                              |                      |
| 20 to 29 years                                                                | 351 (6.7)            |
| 30 to 39 years                                                                | 701 (13.4)           |
| 40 to 49 years                                                                | 907 (17.3)           |
| 50 to 59 years                                                                | 1,200 (22.9)         |
| 60 to 69 years                                                                | 1,482 (28.3)         |
| 70 to 75 years                                                                | 588 (11.2)           |
| Sex (n, %)                                                                    |                      |
| Men                                                                           | 3051 (58.3)          |
| Women                                                                         | 2178 (41.7)          |
| Serum Cr (mg/dL, median, IQR)                                                 | 0.93 (0.76 to 1.15)  |
| Serum Cys-C (mg/L, median, IQR)                                               | 0.92 (0.78 to 1.13)  |
| eGFR using 2006 MDRD (mL/min/1.73 m <sup>2</sup> , median, IQR)               | 77.1 (62.4 to 92.4)  |
| eGFR using 2009 CKD-EPI Cr (mL/min/1.73 m <sup>2</sup> , median, IQR)         | 84.7 (66.9 to 98.3)  |
| eGFR using 2012 CKD-EPI Cys-C (mL/min/1.73 m <sup>2</sup> , median, IQR)      | 87.3 (64.9 to 106.0) |
| eGFR using 2012 CKD-EPI Cr & Cys-C (mL/min/1.73 m <sup>2</sup> , median, IQR) | 86.0 (66.7 to 102.1) |
| eGFR using 2021 CKD-EPI Cr (mL/min/1.73 m <sup>2</sup> , median, IQR)         | 88.9 (70.5 to 102.1) |
| eGFR using 2021 CKD-EPI Cr & Cys-C (mL/min/1.73 m <sup>2</sup> , median, IQR) | 92.4 (71.9 to 109.1) |
| eGFR using 2021 EKFC (mL/min/1.73 m <sup>2</sup> , median, IQR)               | 80.5 (64.3 to 94.2)  |
| Decreased eGFR (< 60 mL/min/1.73 m <sup>2</sup> , CKD ≥ G3a)                  |                      |
| Based on 2006 MDRD 2006 (n, %)                                                | 1,119 (21.4%)        |
| Based on 2009 CKD-EPI Cr (n, %)                                               | 926 (17.7%)          |
| Based on 2012 CKD-EPI Cys-C (n, %)                                            | 1,091 (20.9%)        |
| Based on 2012 CKD-EPI Cr & Cys-C (n, %)                                       | 983 (18.8%)          |
| Based on 2021 CKD-EPI Cr (n, %)                                               | 785 (15.0%)          |
| Based on 2021 CKD-EPI Cr & Cys-C (n, %)                                       | 817 (15.6%)          |
| Based on 2021 EKFC (n, %)                                                     | 1,052 (20.1%)        |

Abbreviations: Cr, creatinine; Cys-C, cystatin C; eGFR, estimated glomerular filtration rate.
